# Supplementary material
Source: publisher site journal article supplement (https://www.spandidos-publications.com/829/downloadSupplementary)
Supplement: Supplementary file 1 [file downloadSupplementary]

Figure S1. Typical dot plots showing gating schemes used for PBMC phenotyping. Gating schemes for determination of following populations: (A) CD45<sup>+</sup>CD3<sup>+</sup>CD8<sup>+</sup> cytotoxic T cells, CD45<sup>+</sup>CD3<sup>+</sup>CD4<sup>+</sup> T helper cells, CD45<sup>+</sup>CD19<sup>+</sup> B cells and CD45<sup>+</sup>CD16/56<sup>+</sup> natural killer cells; (B) HLA-DR<sup>+</sup>CD11c<sup>+</sup> dendritic cells and their CD83 and CD86 expression pattern; (C) HLA-DR<sup>+</sup>CD11c<sup>+</sup> dendritic cells and their CD205 and CD209 expression pattern. PBMC, peripheral blood mononuclear cell.

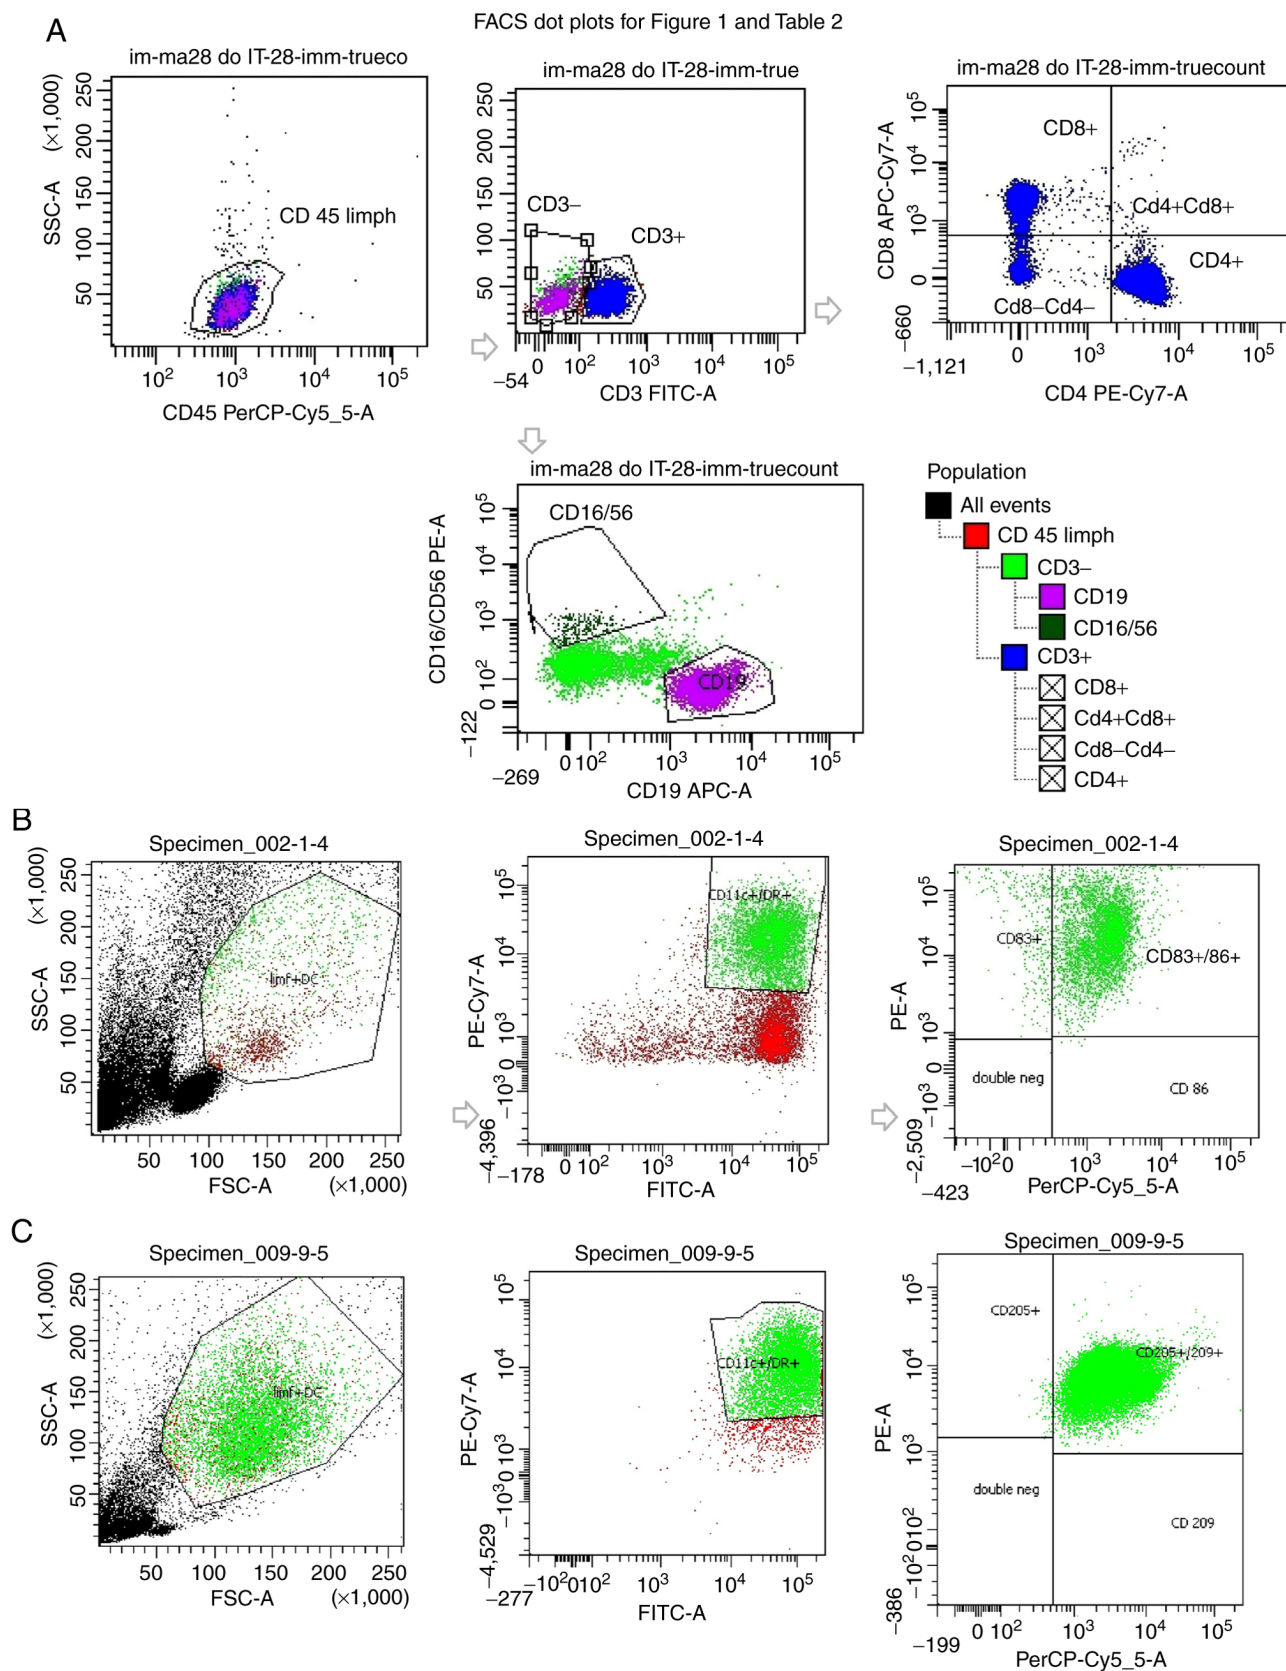

Figure S2. Typical dot plots showing gating schemes used for assessing the levels of regulatory T cells among CD45<sup>+</sup> leukocytes. The CD4<sup>+</sup> CD25<sup>+</sup> cell population was gated, and the number of cells expressing the FoxP3 marker was determined.

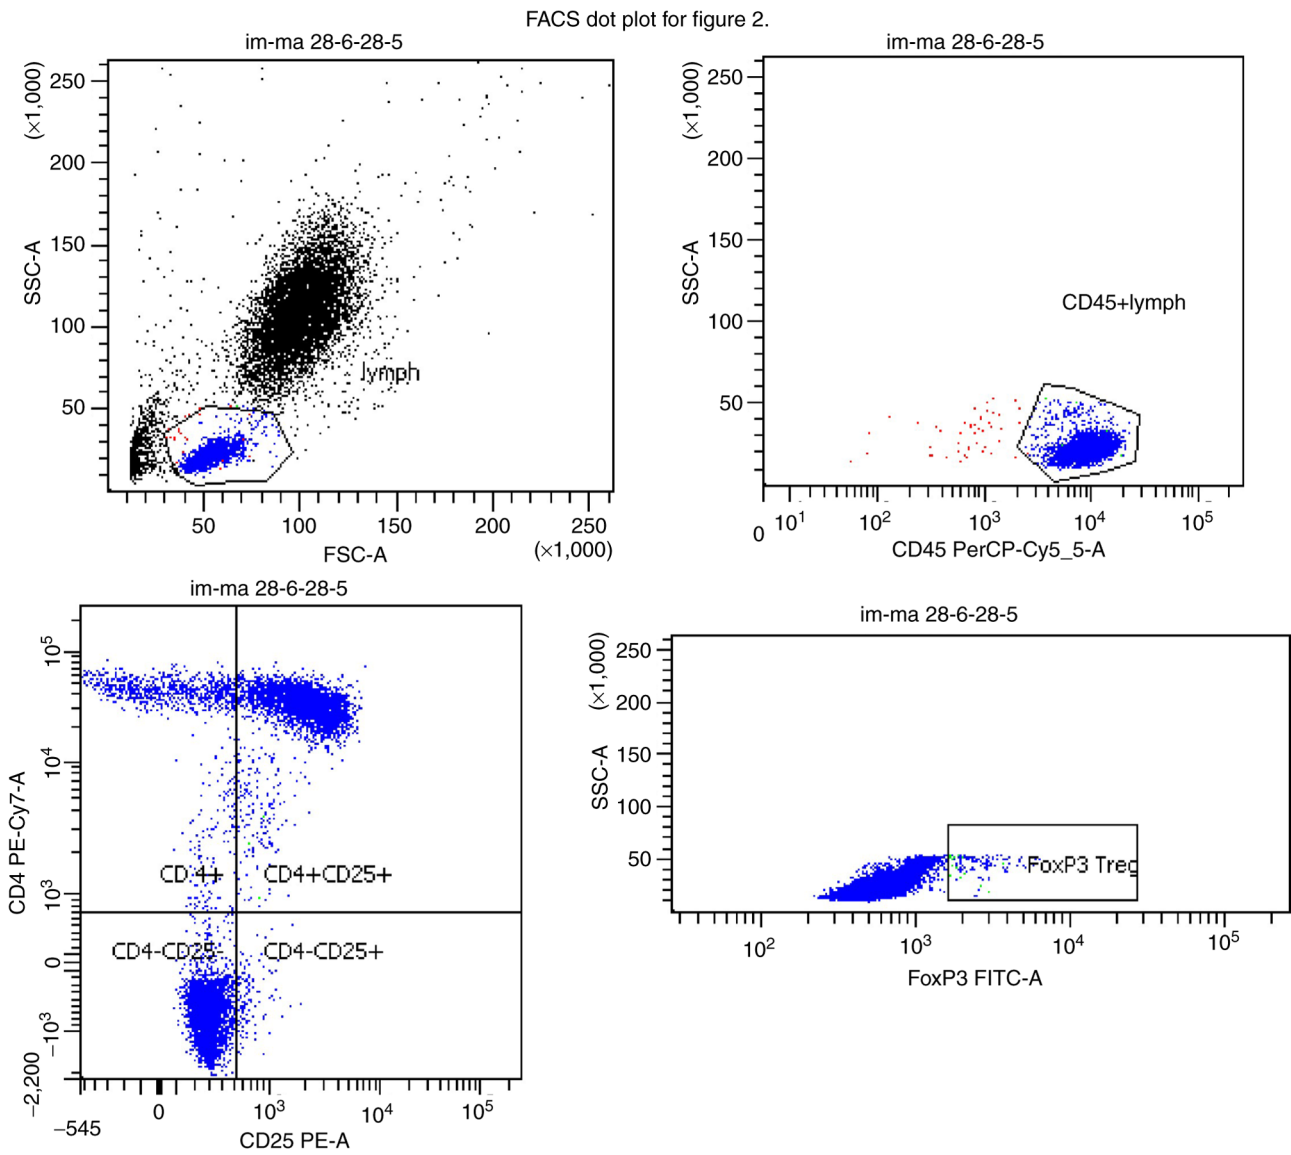

Tube: 28-5

| Population | #Events | %Parent | %Total |
|------------|---------|---------|--------|
| All events | 193,156 | ###     | 100.0  |
| Lymph      | 30,694  | 15.9    | 15.9   |
| CD45+lymph | 29,955  | 97.6    | 15.5   |
| CD4+       | 3,491   | 11.7    | 1.8    |
| CD4+CD25+  | 11,602  | 38.7    | 6.0    |
| FoxP3 Treg | 22      | 0.2     | 0.0    |
| CD4-CD25-  | 14,335  | 47.9    | 7.4    |
| CD4-CD25+  | 527     | 1.8     | 0.3    |

Figure S3. Typical dot plots showing the evaluation of activated HLA-DR-positive and -negative CD14<sup>+</sup> monocytes (monocytes and suppressor myeloid precursor cells, respectively). CD14<sup>+</sup> monocytes were gated from CD45<sup>+</sup> leukocytes, and HLA-DR expression was assessed.

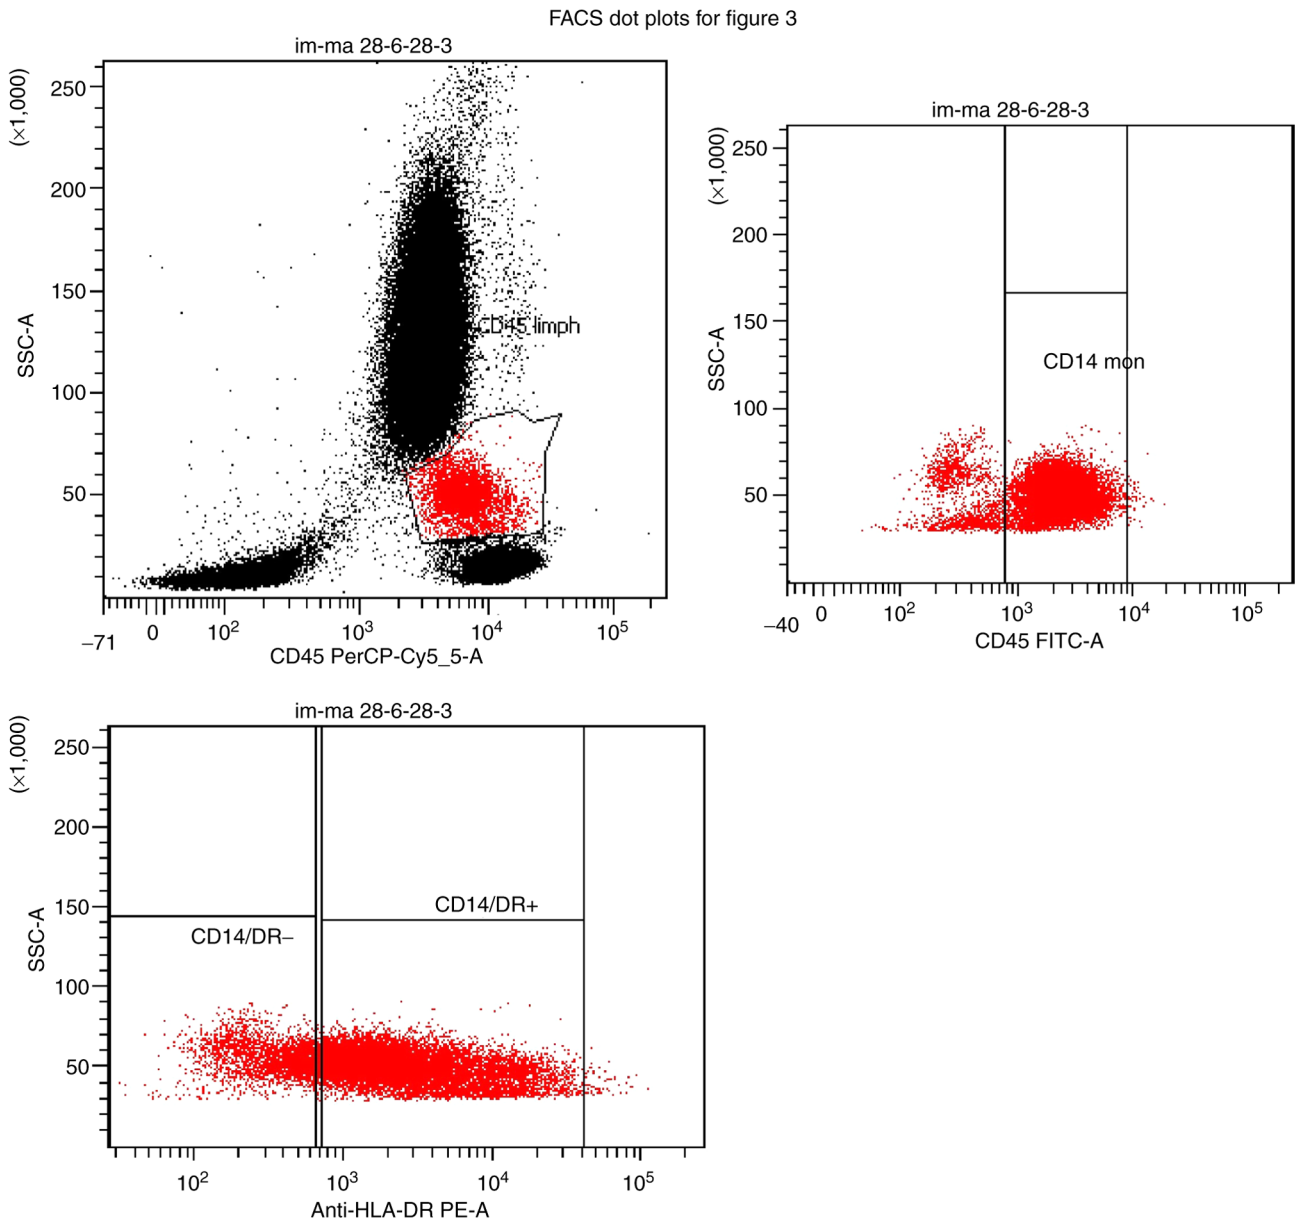

Tube: 28-3

| Population | #Events | %Parent | %Total |
|------------|---------|---------|--------|
| All events | 374,058 | ###     | 100.0  |
| CD45 limph | 16,604  | 4.4     | 4.4    |
| CD14 mon   | 15,042  | 90.6    | 4.0    |
| CD14/DR+   | 12,882  | 85.6    | 3.4    |
| CD14/DR-   | 1,899   | 12.6    | 0.5    |

Figure S4. Typical dot plots showing the gating scheme used to assess the relative amounts of CD45<sup>+</sup>CD123<sup>+</sup> cells (plasmacytoid DCs) and CD45<sup>+</sup>CD11c<sup>+</sup> cells (myeloid DCs). DCs, dendritic cells.

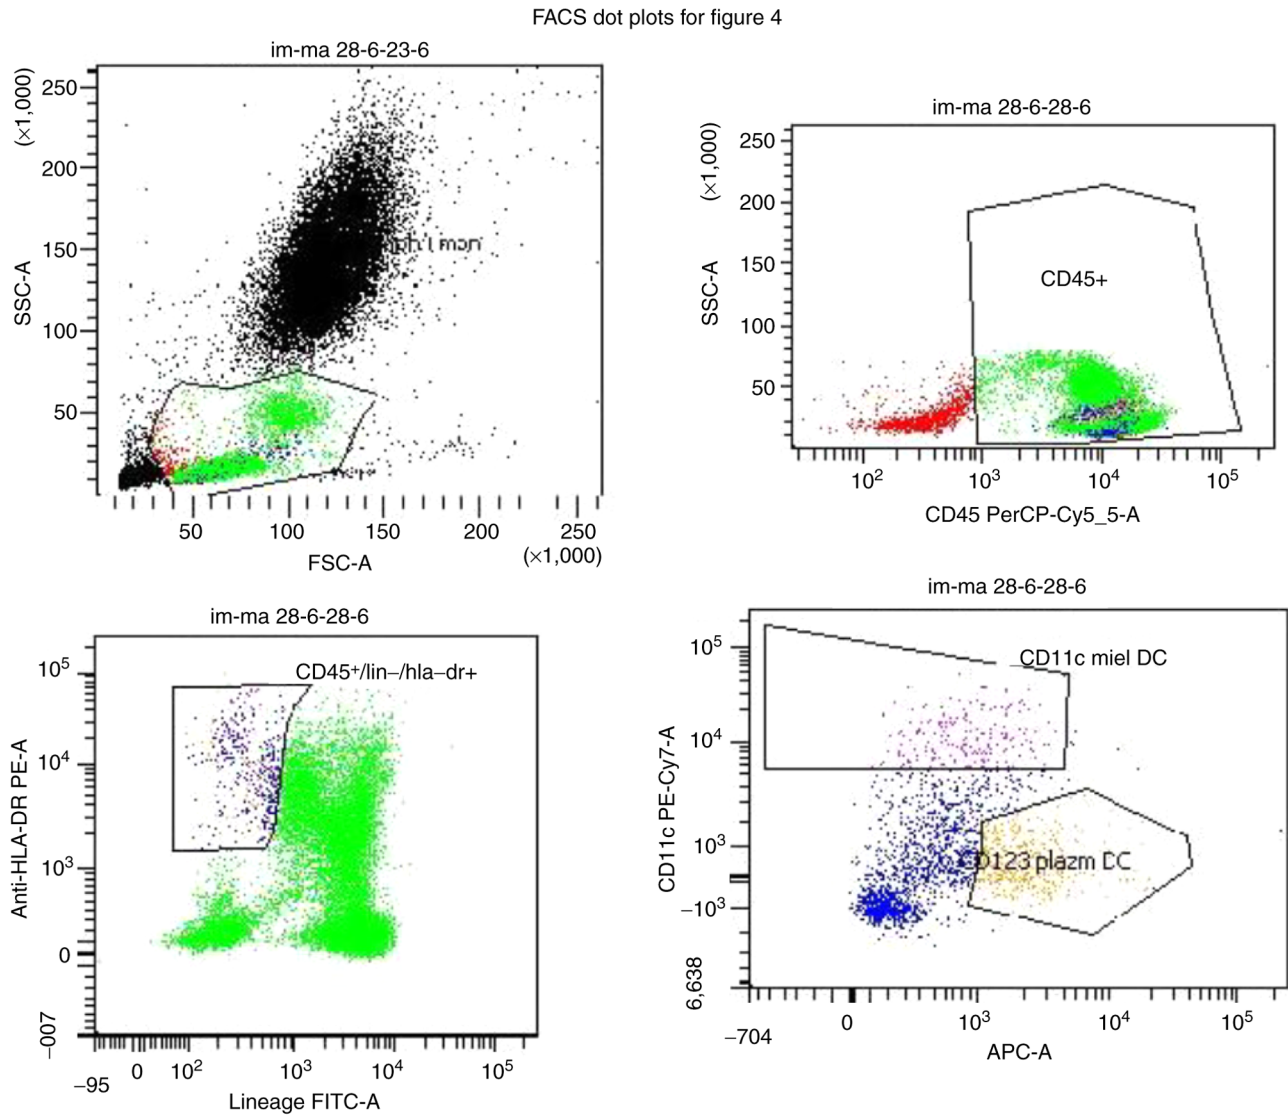

Tube: 28-6

| Population         | #Events | %Parent | %Total |
|--------------------|---------|---------|--------|
| All events         | 455,375 | ####    | 100.0  |
| Lymph+mon          | 101,849 | 22.4    | 22.4   |
| CD45+              | 97,205  | 95.4    | 21.3   |
| CD45+/lin-/hla-dr+ | 2,070   | 2.1     | 0.5    |
| CD11c miel DC      | 210     | 10.1    | 0.0    |
| CD123 plazm DC     | 404     | 19.5    | 0.1    |

| Population         | #Events | %Parent | %Gran... | %Total | FSC-A mean | SEC-A mean |
|--------------------|---------|---------|----------|--------|------------|------------|
| All events         | 455,375 | ####    | ####     | 100.0  | 97,264     | 98,259     |
| Lymph+mon          | 101,849 | 22.4    | ####     | 22.4   | 70,075     | 20,856     |
| CD45+              | 97,205  | 95.4    | 21.3     | 21.3   | 71,274     | 20,830     |
| CD45+/lin-/hla-dr+ | 2,070   | 2.1     | 2.0      | 0.5    | 79,688     | 21,577     |
| CD11c miel DC      | 210     | 10.1    | 0.2      | 0.0    | 83,603     | 26,990     |
| CD123 plazm DC     | 404     | 19.5    | 0.4      | 0.1    | 92,411     | 27,447     |
